# Supplementary material for: Combined and individual doxorubicin/vancomycin drug loading, release kinetics and apatite formation for the CaO–CuO–P2O5–SiO2–B2O3 mesoporous glasses
Source: Royal Society of Chemistry journal article supplement (doi:10.1039/c6ra06829d), 2016-01-01
Supplement: c6ra06829d1.pdf [file c6ra06829d1.pdf]

## SUPPORTING DATA

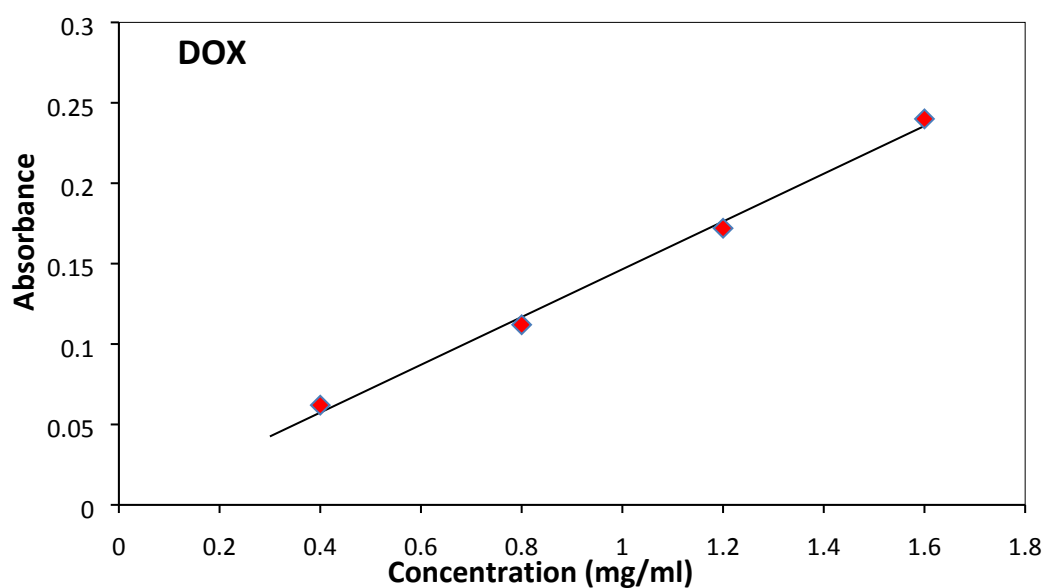

(a)

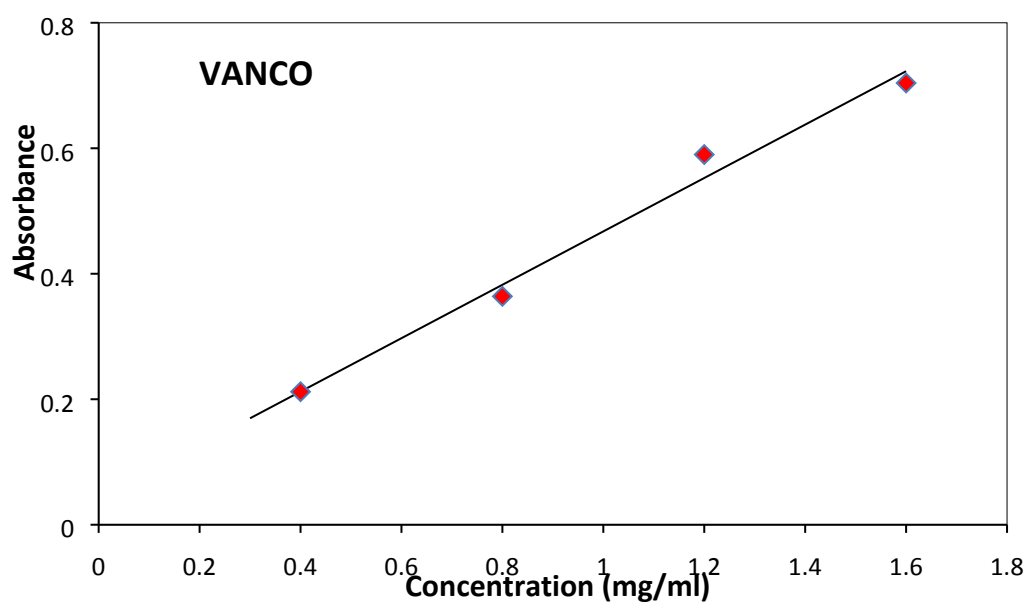

(b)

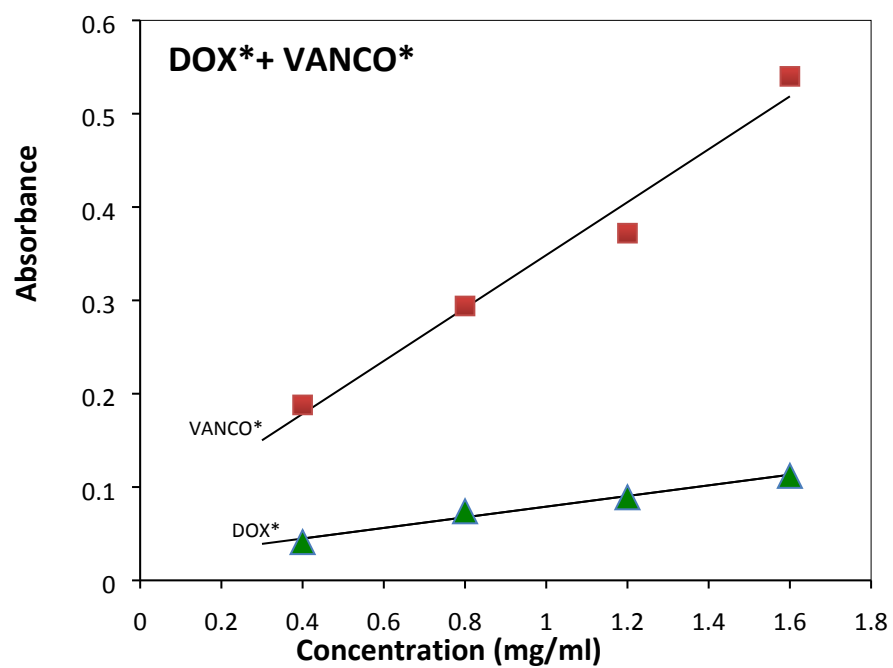

(c)

Fig. (A) Calibration curves for the (a) VANCO (b) DOX and (c) combined DOX\* + VANCO\* drugs (the '\*' part indicates the drugs loaded in combination)
